# Supplementary material for: Inflammatory monocytes regulate Th1 oriented immunity to CpG adjuvanted protein vaccines through production of IL-12
Source: PubMed Central journal article supplement (PMC5519561; doi:10.1038/s41598-017-06236-6), 2017-07-20
Supplement: 41598_2017_6236_MOESM1_ESM.pdf [file 41598_2017_6236_MOESM1_ESM.pdf]

1 **Inflammatory monocytes regulate Th1 oriented immunity to CpG adjuvanted protein vaccines**  
2 **through production of IL-12.**

3 De Koker S<sup>1,3,4\*</sup>, Van Hoecke L<sup>1,4</sup>, De Beuckelaer A<sup>1</sup>, Roose K<sup>1,4</sup>, Deswarte K<sup>2,5</sup>, Willart MA<sup>2,5</sup>, Bogaert P<sup>1</sup>,  
4 Naessens T<sup>1</sup>, De Geest BG<sup>6</sup>, Saelens X<sup>1,4</sup>, Lambrecht BN<sup>2,5</sup>, Grooten J<sup>1\*</sup>

5 1. Department of Biomedical Molecular Biology, Ghent University, Ghent, Belgium.

6 2. VIB Inflammation Research Center, Ghent University, Zwijnaarde, Belgium

7 3. Department of Biochemistry, Ghent University, Ghent, Belgium

8 4. VIB Medical Biotechnology Center, Ghent University, Ghent, Belgium

9 5. Department of Respiratory Medicine, University Hospital Ghent, Ghent, Belgium

10 6. Department of Pharmaceutics, Ghent University, Ghent, Belgium.

11 \* To whom all correspondence should be addressed

12

13 **Figure S1**

**A**

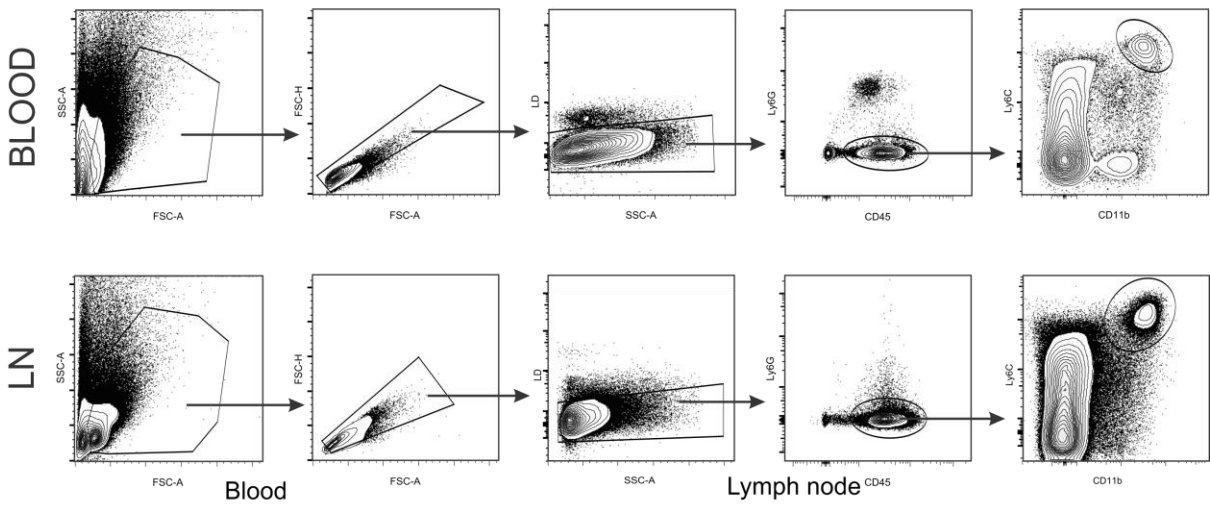

**B**

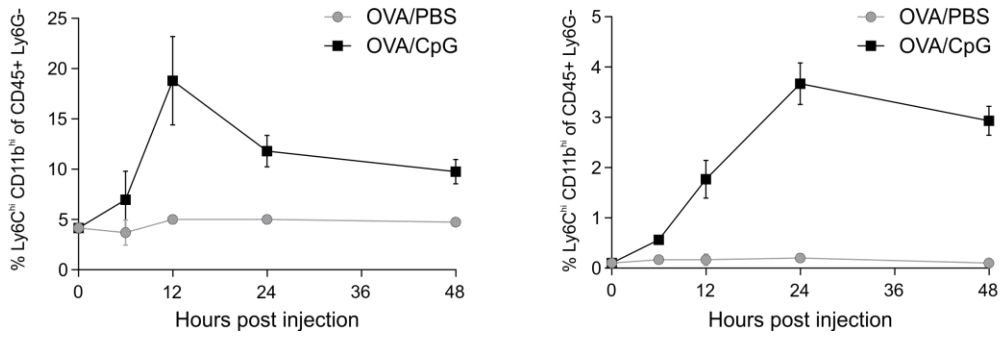

14

15

16 **(A)** Gating strategy applied to identify Ly6C<sup>hi</sup> monocytes in blood (upper panel) and lymph nodes (lower  
 17 panel). **(B)** Graphs showing the percentages of Ly6Chi monocytes in blood (left panel) and lymph nodes  
 18 (right panel) at the indicated time intervals post OVA/CpG and OVA/PBS injection (n =4; mean +/- SD).

19

20 **Figure S2**

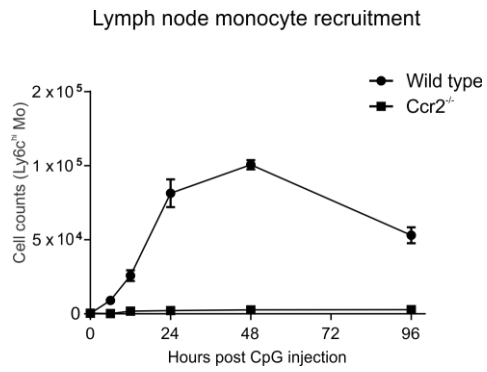

21

22

23 Absolute numbers of Ly6C<sup>hi</sup> monocytes in the draining lymph node of OVA/CpG injected WT and Ccr2<sup>-/-</sup>

24 mice at the indicated time intervals (n = 4; mean +/- SD).

25
